# Supplementary material
Source: PubMed Central journal article supplement (PMC3888489)

**SUPPLEMENTAL MATERIAL***Supplement A: Flow diagram for Participant Inclusion*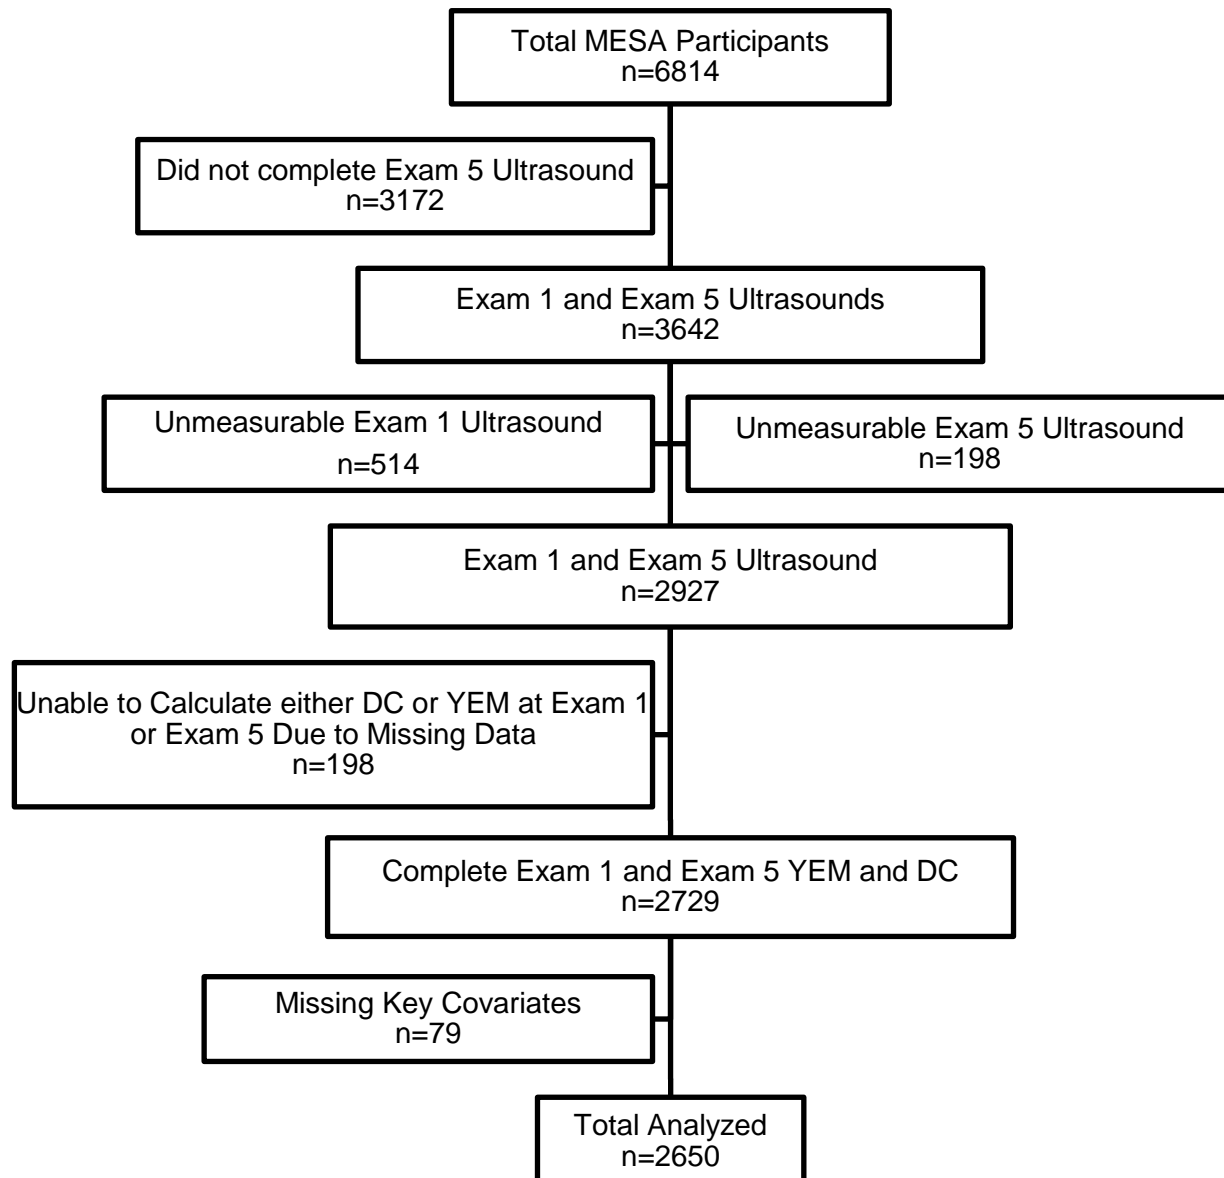

As is typically seen in longitudinal epidemiological studies, the 2650 subjects included in our analysis were healthier than the entire MESA sample. They were younger, had higher education levels, less diabetes mellitus, lower blood pressure, lower body-mass index, and fewer smoked. Since the subjects analyzed were healthier, our analyses would be expected to create a bias towards the null.

*Supplement B. Measurement of Carotid Distensibility and Young's Elastic Modulus*

The carotid distensibility coefficient (DC) was calculated as:

$$DC = \frac{(Ds^2 - Dd^2)}{\Delta p \cdot Dd^2}$$

$Ds$  represents the internal arterial diameter at peak systole,  $Dd$  represents the internal diameter at end-diastole, and  $\Delta p$  represents the difference between the systolic and diastolic measurements (pulse pressure).<sup>1</sup> Young's elastic Modulus (YEM), the ratio of stress and circumferential strain in the arterial wall, was calculated as:

$$YEM = \frac{Dd/h}{DC}$$

$Dd$  is the arterial diameter at end-diastole,  $h$  is the arterial wall thickness at end-diastole (external carotid artery diameter minus internal carotid artery diameter).<sup>1,2</sup> YEM and DC are inversely related, thus increased arterial stiffness corresponds to a lower DC and a higher YEM. The derived wall thickness ( $h$ ) was strongly correlated with the far wall carotid IMT values measured directly using a semi-automated border detection program ( $r=0.78$ ,  $p < 0.0001$ ).

*Supplement C: Intra- and Inter-reader Reproducibility*

Reproducibility measurements were performed by a single reader with 25 representative images. Reproducibility was excellent:  $p < 0.0001$  for all measurements: internal end-diastolic diameter ( $r=0.998$ ), peak systolic internal diameter ( $r=0.998$ ), end-diastolic external diameter ( $r=0.997$ ), change in diameter ( $r=0.925$ ) and wall thickness ( $r=0.989$ ).

Paired, blinded measurements of the diameter of an ultrasound phantom containing a simulated blood vessel showed mean (standard deviation) diameters of 3.47 (0.02) mm for digitized videotape and 3.47 (0.01) mm for digitized videostream (t-test  $p=0.660$ ). The size of a digitized pixel using the Medical Digital Recording device was 0.056 mm. A systematic bias of <

1/2 digital pixel (0.028 mm) was statistically rejected using the two, one-sided test (TOST), thus demonstrating equivalence of both measurements using digitized videotape and digitized video stream.<sup>3,4</sup> Based on these findings and the visual appearance of essentially superimposable images from digitized videotape and video stream, even if a very small bias existed, it would not affect the relationships between the covariates (it only would affect the absolute values of the measurements).

Approximately 90% of readings were performed by two readers. Inter-reader correlations were 0.99 for all 3 diameter measurements and 0.96 for wall thickness. Of note, each reader read both sets of distensibility studies for each subject, so there is no bias by reader within subjects, which the basis of all of our analyses

### Supplement References

1. Laurent S, Cockcroft J, Van Bortel L, Boutouyrie P, Giannattasio C, Hayoz D, Pannier B, Vlachopoulos C, Wilkinson I, Struijker-Boudier H. Expert consensus document on arterial stiffness: Methodological issues and clinical applications. *Eur Heart J*. 2006;27:2588-2605
2. Reneman RS, Meinders JM, Hoeks AP. Non-invasive ultrasound in arterial wall dynamics in humans: What have we learned and what remains to be solved. *Eur Heart J*. 2005;26:960-966
3. Hsu J, Hwang J, Liu H-K, Ruberg S. Confidence intervals associated with tests for bioequivalence. *Biometrika* 1994;81:103-114.
4. Chow S, Liu J. Design and analysis of bioequivalence studies. New York: Marcel Dekker; 1992.

**Supplementary Table I. Multivariate ANCOVA Regression Models for Change in Young's Elastic Modulus without Adjustment for Baseline Young's Elastic Modulus**

|                                          | Significant predictors                                               | $\beta$ | p-value |
|------------------------------------------|----------------------------------------------------------------------|---------|---------|
|                                          | Age                                                                  | 10.9    | 0.0004  |
| <b>Model 1</b><br>R <sup>2</sup> =0.0236 | Education level (compared to those who did not graduate high school) |         |         |
|                                          | Greater than high school                                             | -200.2  | 0.03    |
|                                          | Use of antihypertensive medication at baseline                       | 112.8   | 0.05    |
|                                          | Age                                                                  | 11.2    | 0.0002  |
| <b>Model 2</b><br>R <sup>2</sup> =0.0272 | Education level (compared to those who did not graduate high school) |         |         |
|                                          | Greater than high school                                             | -202.6  | 0.03    |
|                                          | Stopping antihypertensive medication                                 | 398.4   | 0.006   |

Model covariates are the same as in Table 2.

**Supplementary Table II. Multivariate ANCOVA Regression Models for Change in Distensibility Coefficient without Adjustment for Baseline Distensibility Coefficient**

|                | Significant predictors                                             | $\beta$               | p-value |
|----------------|--------------------------------------------------------------------|-----------------------|---------|
|                | Study site                                                         |                       |         |
|                | University of Minnesota                                            | $4.0 \times 10^{-4}$  | <0.0001 |
|                | Columbia                                                           | $3.4 \times 10^{-4}$  | <0.0001 |
| <b>Model 1</b> | University of California – Los Angeles                             | $2.0 \times 10^{-4}$  | 0.02    |
| $R^2 = 0.046$  | Active smoker at baseline                                          | $-2.0 \times 10^{-4}$ | 0.008   |
|                | Activity Level (compared to the least active subjects, quartile 1) |                       |         |
|                | Quartile 2                                                         | $-1.5 \times 10^{-4}$ | 0.02    |
|                | Baseline systolic blood pressure (per mmHg)                        | $7.7 \times 10^{-6}$  | <0.0001 |
|                | Study site                                                         |                       |         |
|                | University of Minnesota                                            | $3.9 \times 10^{-4}$  | <0.0001 |
|                | University of California – Los Angeles                             | $1.9 \times 10^{-4}$  | 0.03    |
|                | Active smoker at baseline                                          | $-2.0 \times 10^{-4}$ | 0.007   |
| <b>Model 2</b> | Activity Level (compared to the least active subjects, quartile 1) |                       |         |
| $R^2 = 0.053$  | Quartile 2                                                         | $-1.4 \times 10^{-4}$ | 0.02    |
|                | Baseline systolic blood pressure (per mmHg)                        | $6.0 \times 10^{-6}$  | <0.0001 |
|                | Starting antihypertensive medication                               | $2.2 \times 10^{-4}$  | 0.0002  |

Model covariates are the same as in Table 2.

**Supplementary Table III. Participant Characteristics by Ethnic Group**

|                                  | Baseline        |                 |                  |                   |         | Exam 5          |                 |                  |                   |         |
|----------------------------------|-----------------|-----------------|------------------|-------------------|---------|-----------------|-----------------|------------------|-------------------|---------|
|                                  | White<br>N=1039 | Black<br>N=660  | Chinese<br>N=380 | Hispanic<br>N=571 | P       | White<br>N=1039 | Black<br>N=660  | Chinese<br>N=380 | Hispanic<br>N=571 | P       |
| Age (years)                      | 59.9 (9.3)      | 59.8 (9.2)      | 60.5 (9.3)       | 59.4 (9.7)        | 0.359   | 69.4 (9.2)      | 69.1 (9.1)      | 70.1 (9.2)       | 68.9 (9.5)        | 0.22    |
| Female sex (%)                   | 541(52.1)       | 385 (58.3)      | 185 (48.7)       | 303 (53.1)        | 0.014   |                 |                 |                  |                   |         |
| Study Site (%)                   |                 |                 |                  |                   |         |                 |                 |                  |                   |         |
| Wake Forest                      | 240 (23.1)      | 213 (32.3)      | 0 (0.0)          | 1 (0.2)           |         |                 |                 |                  |                   |         |
| Columbia                         | 112 (10.8)      | 164 (24.9)      | 2 (0.5)          | 241 (42.2)        |         |                 |                 |                  |                   |         |
| John Hopkins                     | 133 (12.8)      | 110 (16.7)      | 0 (0.0)          | 0 (0.0)           |         |                 |                 |                  |                   |         |
| U Minnesota                      | 254 (24.5)      | 0 (0.0)         | 0 (0.0)          | 157 (27.5)        | <0.0001 |                 |                 |                  |                   |         |
| Northwestern                     | 251 (24.2)      | 117 (17.7)      | 184 (48.4)       | 0 (0.0)           |         |                 |                 |                  |                   |         |
| UCLA                             | 49 (4.7)        | 56 (8.5)        | 194 (51.1)       | 172 (30.1)        |         |                 |                 |                  |                   |         |
| Blood pressure parameters (mmHg) |                 |                 |                  |                   |         |                 |                 |                  |                   |         |
| SBP                              | 120.5<br>(19.3) | 128.7<br>(19.6) | 121.7<br>(19.9)  | 123.2<br>(20.5)   | <0.0001 | 120.7<br>(19.5) | 128.0<br>(21.0) | 122.3<br>(20.0)  | 124.9<br>(21.1)   | <0.0001 |

|                                      |                 |                 |                 |                  |         |                 |                 |                 |                 |         |
|--------------------------------------|-----------------|-----------------|-----------------|------------------|---------|-----------------|-----------------|-----------------|-----------------|---------|
| DBP                                  | 70.0<br>(10.1)  | 74.6 (9.7)      | 72.0<br>(10.5)  | 71.2 (9.6)       | <0.0001 | 67.1<br>(10.0)  | 70.6<br>(10.5)  | 68.0 (9.4)      | 68.4<br>(10.3)  | <0.0001 |
| Pulse Pressure                       | 50.5<br>(15.1)  | 54.2<br>(15.7)  | 49.6<br>(14.8)  | 52.1<br>(16.4)   | <0.0001 | 53.5<br>(16.3)  | 57.4<br>(17.2)  | 54.3<br>(17.2)  | 56.5<br>(17.5)  | <0.0001 |
| HTN (%)                              | 385 (37.1)      | 371 (56.2)      | 138 (36.3)      | 224 (39.2)       | <0.0001 | 570 (54.9)      | 491 (74.4)      | 198 (52.1)      | 337 (59.1)      | <0.0001 |
| HTN meds (%)                         | 297 (28.6)      | 300 (45.5)      | 96 (25.3)       | 171 (30.0)       | <0.0001 | 493 (47.5)      | 435 (65.9)      | 173 (45.5)      | 289 (50.6)      | <0.0001 |
| Diabetes mellitus status (%)         |                 |                 |                 |                  |         |                 |                 |                 |                 |         |
| IFG                                  | 95 (9.1)        | 79 (12.0)       | 67 (17.6)       | 76 (13.3)        |         | 197 (19.1)      | 111 (17.0)      | 104 (27.5)      | 145 (25.5)      |         |
| Untreated                            | 8 (0.8)         | 14 (2.1)        | 7 (1.8)         | 13 (2.3)         | <0.0001 | 13 (1.3)        | 8 (1.2)         | 9 (2.4)         | 11 (1.9)        | <0.0001 |
| Treated                              | 28 (2.7)        | 63 (9.6)        | 29 (7.6)        | 61 (10.7)        |         | 91 (8.8)        | 139 (21.3)      | 69 (18.3)       | 121 (21.3)      |         |
| Lipids (mg/dL)                       |                 |                 |                 |                  |         |                 |                 |                 |                 |         |
| Total cholesterol                    | 195.3<br>(34.9) | 190.1<br>(34.9) | 191.5<br>(31.6) | 198.2<br>(36.7)  | 0.0002  | 182.8<br>(37.1) | 184.7<br>(36.1) | 186.1<br>(36.7) | 182.5<br>(36.8) | 0.34    |
| Low-density lipoprotein cholesterol  | 116.8<br>(29.0) | 117.2<br>(32.2) | 114.4<br>(28.4) | 119.9<br>(32.4)  | 0.0524  | 104.2<br>(31.8) | 107.9<br>(32.4) | 106.6<br>(31.5) | 106.0<br>(32.0) | 0.15    |
| High-density lipoprotein cholesterol | 52.4<br>(15.8)  | 53.4<br>(15.4)  | 49.7<br>(13.2)  | 49.0<br>(14.2)   | <0.0001 | 57.4<br>(17.9)  | 59.0<br>(18.2)  | 55.4<br>(14.8)  | 52.6<br>(15.5)  | <0.0001 |
| Triglycerides                        | 130.2<br>(80.0) | 97.6<br>(52.7)  | 139.2<br>(81.9) | 150.0<br>(100.4) | <0.0001 | 106.0<br>(56.2) | 90.3<br>(48.7)  | 123.4<br>(75.9) | 121.3<br>(63.9) | <0.0001 |
| Lipid-lowering meds (%)              | 178 (17.1)      | 99 (15.0)       | 49 (12.9)       | 74 (13.0)        | 0.0773  | 431 (41.5)      | 228 (34.6)      | 123 (32.4)      | 211 (37.0)      | 0.003   |

|                                              |                  |                  |                  |                  |         |                  |                  |                  |                  |         |
|----------------------------------------------|------------------|------------------|------------------|------------------|---------|------------------|------------------|------------------|------------------|---------|
| BMI (kg/m <sup>2</sup> )                     | 27.4 (4.8)       | 29.6 (5.3)       | 23.9 (3.1)       | 28.5 (4.4)       | <0.0001 | 27.7 (5.1)       | 29.7 (5.4)       | 24.0 (3.2)       | 28.9 (5.1)       | <0.0001 |
| Waist (cm)                                   | 96.8<br>(14.2)   | 99.4<br>(13.7)   | 86.4 (9.5)       | 98.0<br>(11.9)   | <0.0001 | 98.4<br>(14.3)   | 101.1(13.<br>4)  | 88.2<br>(10.0)   | 99.2<br>(12.3)   | <0.0001 |
| Smoking (%)                                  |                  |                  |                  |                  |         |                  |                  |                  |                  |         |
| Former                                       | 436 (42.0)       | 251 (38.0)       | 74 (19.5)        | 179 (31.4)       |         | 528 (51.0)       | 319 (48.5)       | 99 (26.1)        | 259 (45.8)       |         |
| Current                                      | 112 (10.8)       | 99 (15.0)        | 16 (4.2)         | 70 (12.3)        | <0.0001 | 77 (7.4)         | 74 (11.3)        | 11 (2.9)         | 32 (5.7)         | <0.0001 |
| YEM (mmHg)                                   | 1436<br>(823)    | 1630<br>(1023)   | 1733<br>(996)    | 1687<br>(908)    | <0.0001 | 1600<br>(1065)   | 1843<br>(1722)   | 1958<br>(1375)   | 1771<br>(1044)   | <0.0001 |
| DC<br>(10 <sup>-3</sup> mmHg <sup>-1</sup> ) | 3.4 (1.3)        | 2.9 (1.2)        | 3.0 (1.2)        | 3.0 (1.2)        | <0.0001 | 2.9 (1.2)        | 2.5 (1.1)        | 2.6 (1.0)        | 2.6 (1.1)        | <0.0001 |
| Carotid wall<br>thickness (cm)               | 0.145<br>(0.029) | 0.156<br>(0.032) | 0.141<br>(0.029) | 0.145<br>(0.031) | <0.0001 | 0.161<br>(0.030) | 0.173<br>(0.033) | 0.154<br>(0.031) | 0.163<br>(0.035) | <0.0001 |
| PSI Diameter (cm)                            | 0.628<br>(0.075) | 0.625<br>(0.079) | 0.633<br>(0.078) | 0.622<br>(0.066) | 0.15    | 0.646<br>(0.081) | 0.639<br>(0.083) | 0.658<br>(0.084) | 0.635<br>(0.068) | <0.0001 |
| EDI Diameter (cm)                            | 0.579<br>(0.071) | 0.580<br>(0.075) | 0.590<br>(0.073) | 0.578<br>(0.063) | 0.03    | 0.599<br>(0.077) | 0.597<br>(0.079) | 0.617<br>(0.080) | 0.592<br>(0.065) | <0.0001 |

See Table 1 for abbreviations



**Supplementary Figure I. Change in Young's Elastic Modulus by Ethnicity**

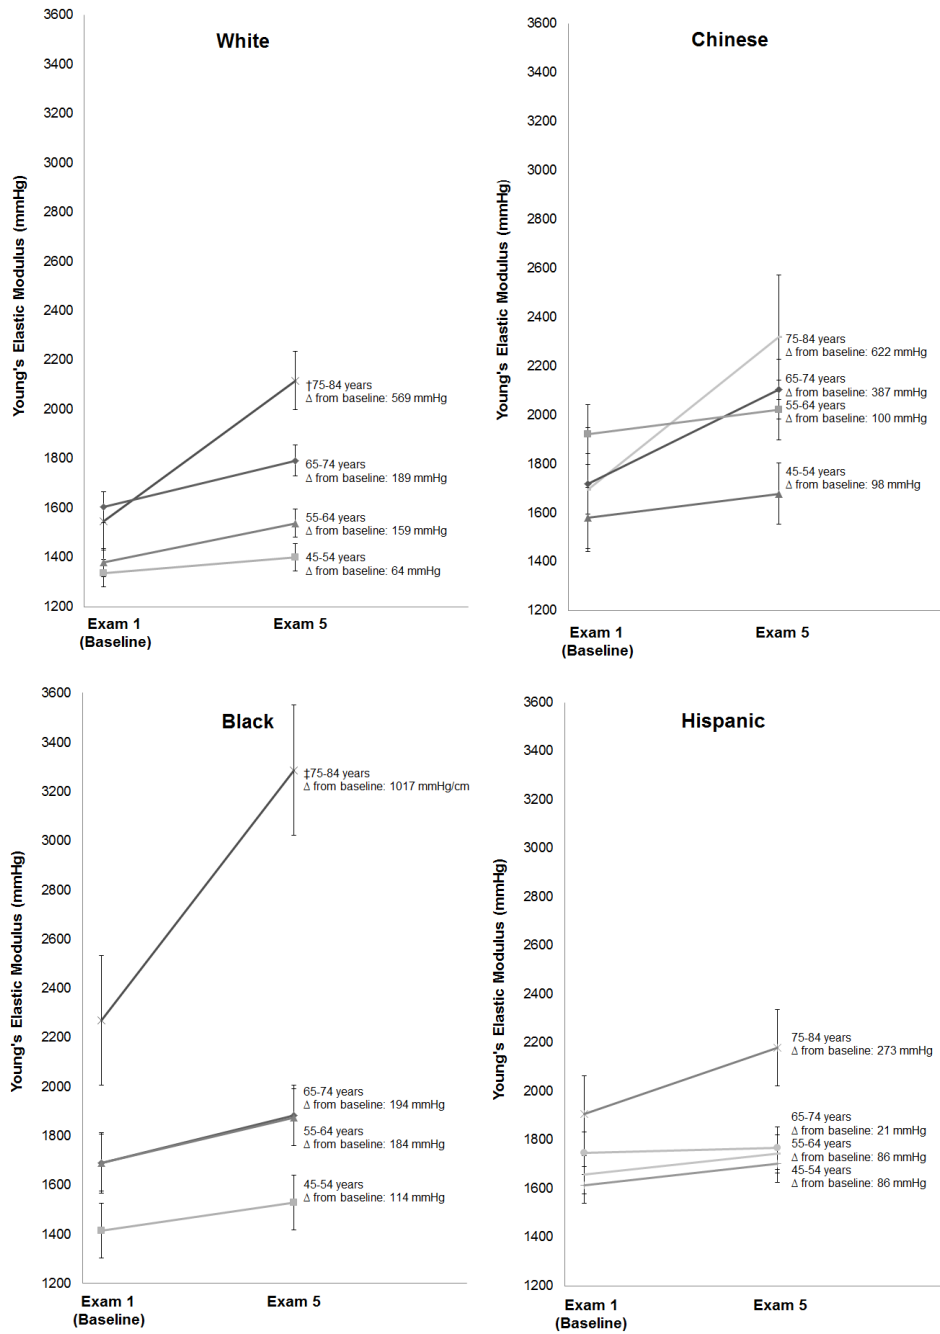

† p=0.002; ‡ p=0.010 for age group x exam interaction term

Supplementary Figure II. Change in Distensibility Coefficient by Ethnicity

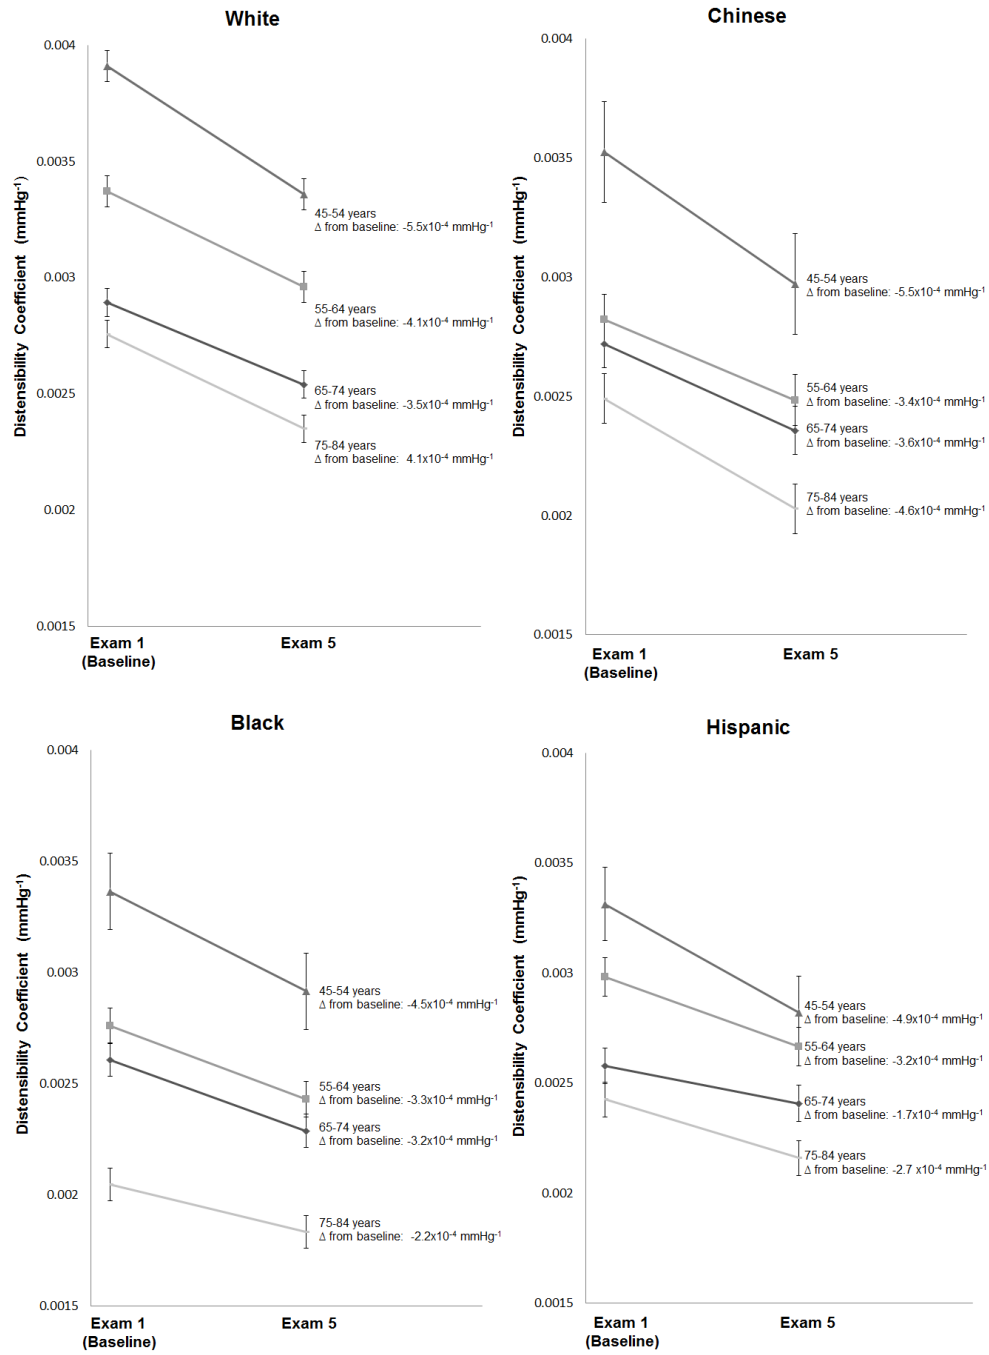

Supplement: NIHMS543065-supplement-Legacy_Supplemental_File.pdf [file NIHMS543065-supplement-Legacy_Supplemental_File.pdf]
